# Supplementary material for: A multi-center international study to evaluate the safety, functional and oncological outcomes of Irreversible Electroporation for the ablation of prostate cancer
Source: Research Square preprint supplement (doi:10.21203/rs.3.rs-3248717/v1), 2023-09-08
Supplement: Supplementary file 1 [file 43c84ed16f0032a8b1a02493.docx]

Supplementary Table 2 Repeat biopsy results in different centers

| Center (Patient number) | MRI post-IRE | Repeat biopsy | Any grade prostate cancer | Clinically significant prostate cancer | Clinically insignificant prostate cancer |
| --- | --- | --- | --- | --- | --- |
| Klinik for Prostata Therapie (83) | 47 | 6 | 4 | 2 | 2 |
| St Vincents Private Hospital Sydney (116) | 116 | 52 | 28 | 13 | 15 |
| Tenon Hospital (97) | 75 | 22 | 9 | 5 | 4 |
| Vitus Privatklinik and Institute for Bildgebende Diagnostik (53) | 37 | 3 | 2 | 2 | 0 |
| Clinique Mutualiste Saint Germain (61) | 54 | 33 | 26 | 6 | 20 |
