# Supplementary material for: A multi-center international study to evaluate the safety, functional and oncological outcomes of Irreversible Electroporation for the ablation of prostate cancer
Source: Research Square preprint supplement (doi:10.21203/rs.3.rs-3248717/v1), 2023-09-08
Supplement: Supplementary file 2 [file 8ea4548c7660226a1ab70b85.docx]

Supplementary Table 1: The change of biopsy results after treatment

| Biopsy**  Biopsy* | Negative | Clinically insignificant | Clinically significant | Total |
| --- | --- | --- | --- | --- |
| Clinically insignificant | 12 | 18 | 8 | 38 |
| Clinically significant | 33 | 23 | 20 | 76 |
| Total | 45 | 41 | 28 | 114 |

Biopsy*: Biopsy result in the baseline biopsy

Biopsy**: Biopsy results in the repeat biopsy
